# Supplementary material for: Efficient modification of PAMAM G1 dendrimer surface with β-cyclodextrin units by CuAAC: impact on the water solubility and cytotoxicity
Source: PubMed Central journal article supplement — RSC Adv. 2020 Jul 7;10(43):25557–66. doi: 10.1039/d0ra02574g (PMC9055266; doi:10.1039/d0ra02574g), 2020-07-07
Supplement: RA-010-D0RA02574G-s001.pdf [file RA-010-D0RA02574G-s001.pdf]

# *Supplementary Information*

## **Analysis data of**

|                                                                                                       |     |
|-------------------------------------------------------------------------------------------------------|-----|
| <b>Figure S 1.</b> <sup>1</sup> H-NMR spectrum of intermediate I.                                     | p2  |
| <b>Figure S 2.</b> <sup>13</sup> C-NMR spectrum of intermediate I.                                    | p2  |
| <b>Figure S 3.</b> ESI spectrum of intermediate I.                                                    | p3  |
| <b>Figure S 4.</b> <sup>1</sup> H-NMR spectrum of intermediate II.                                    | p3  |
| <b>Figure S 5.</b> <sup>13</sup> C-NMR spectrum of intermediate II.                                   | p4  |
| <b>Figure S 6.</b> ESI spectrum of intermediate II.                                                   | p4  |
| <b>Figure S 7.</b> <sup>1</sup> H-NMR spectrum of Alkynyl-PAMAM G1.                                   | p5  |
| <b>Figure S 8.</b> <sup>13</sup> C-NMR spectrum of Alkynyl-PAMAM G1.                                  | p5  |
| <b>Figure S 9.</b> MALDI spectrum of Alkynyl-PAMAM G1.                                                | p6  |
| <b>Figure S 10.</b> <sup>1</sup> H-NMR spectrum of m-Ts-β-CD.                                         | p6  |
| <b>Figure S 11.</b> <sup>13</sup> C-NMR spectrum of m-Ts-β-CD.                                        | p7  |
| <b>Figure S 12.</b> MALDI spectrum of m-Ts-β-CD.                                                      | p7  |
| <b>Figure S 13.</b> <sup>1</sup> H-NMR spectrum of m-N <sub>3</sub> -β-CD.                            | p8  |
| <b>Figure S 14.</b> <sup>13</sup> C-NMR spectrum of m-N <sub>3</sub> -β-CD.                           | p8  |
| <b>Figure S 15.</b> MALDI spectrum of m-N <sub>3</sub> -β-CD.                                         | p9  |
| <b>Figure S 16.</b> <sup>13</sup> C-NMR spectrum of PAMAM G1-β-CD dendrimer.                          | p9  |
| <b>Figure S 17.</b> Elemental analysis by X-ray fluorescence of PAMAM G1-β-CD dendrimer.              | p10 |
| <b>Figure S 18.</b> Cell viability in different cell lines of PAMAM G1 dendrimer (mean ± S.D., n=15). | P11 |

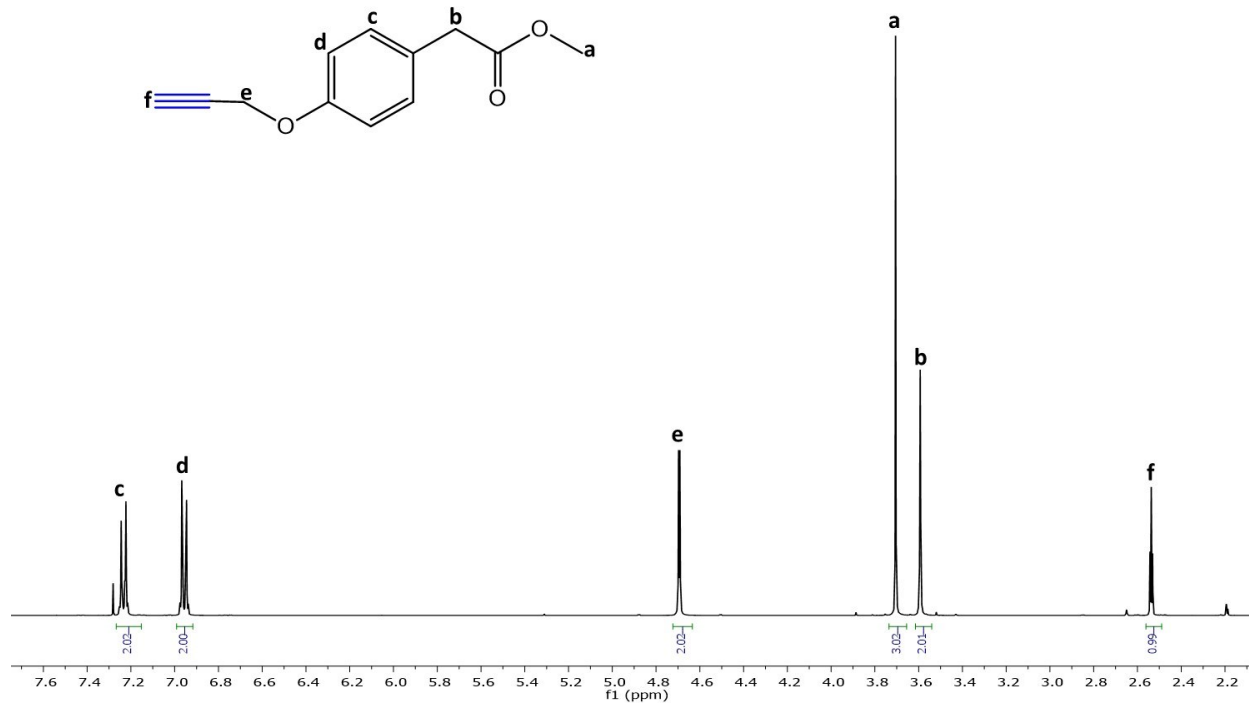

Figure S 1.  $^1\text{H}$ -NMR spectrum of intermediate I.

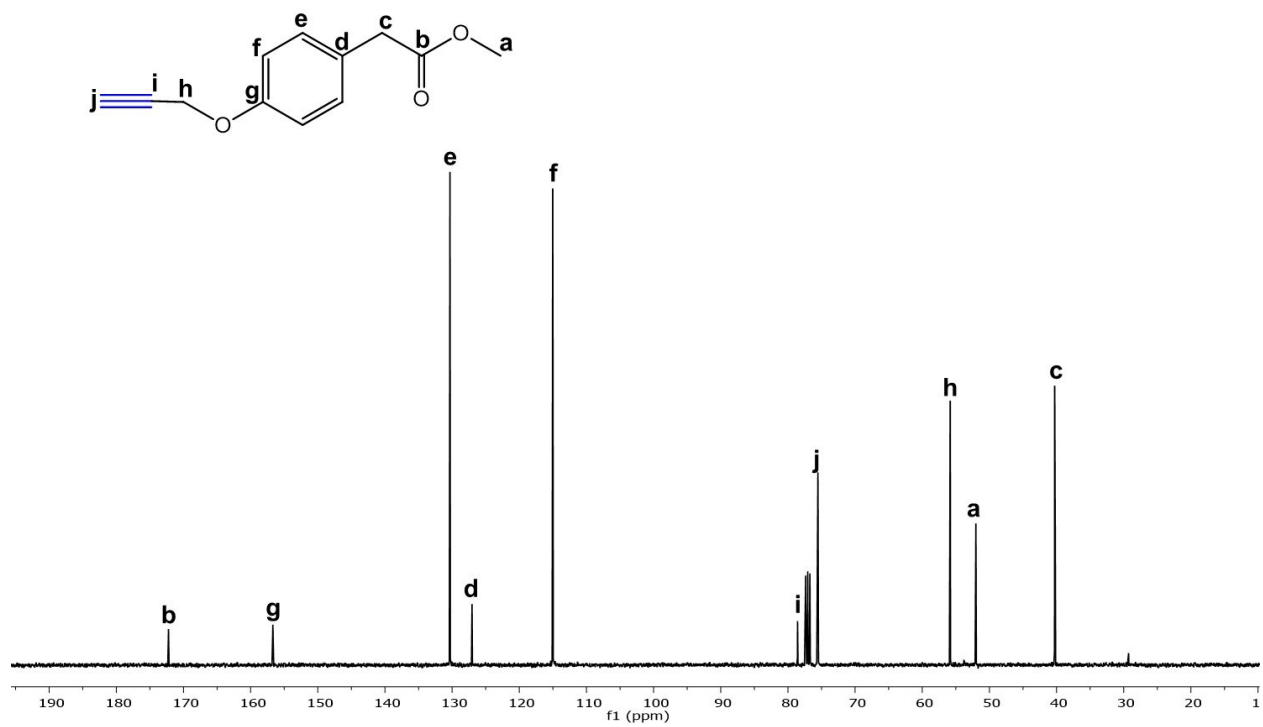

Figure S 2.  $^{13}\text{C}$ -NMR spectrum of intermediate I.

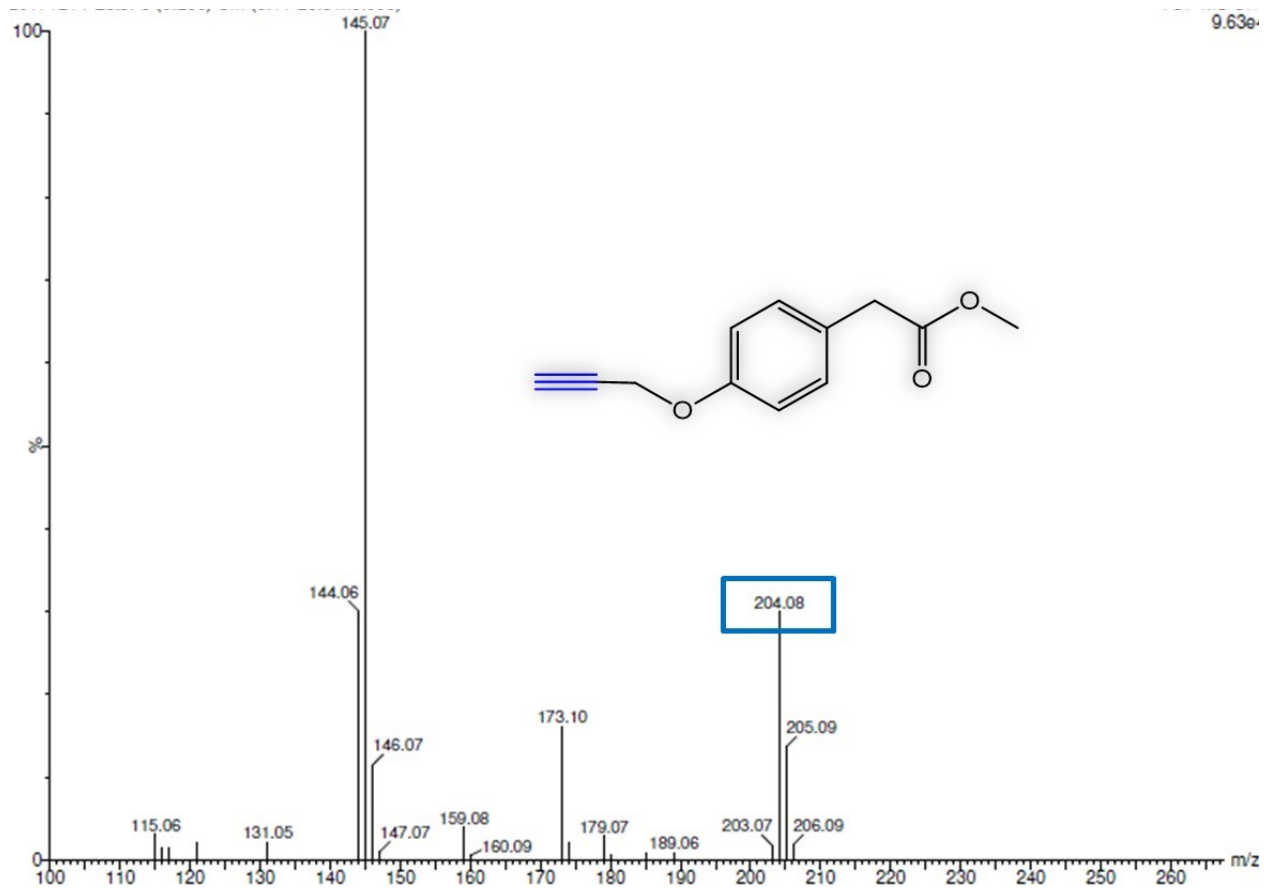

Figure S 3. ESI spectrum of intermediate I.

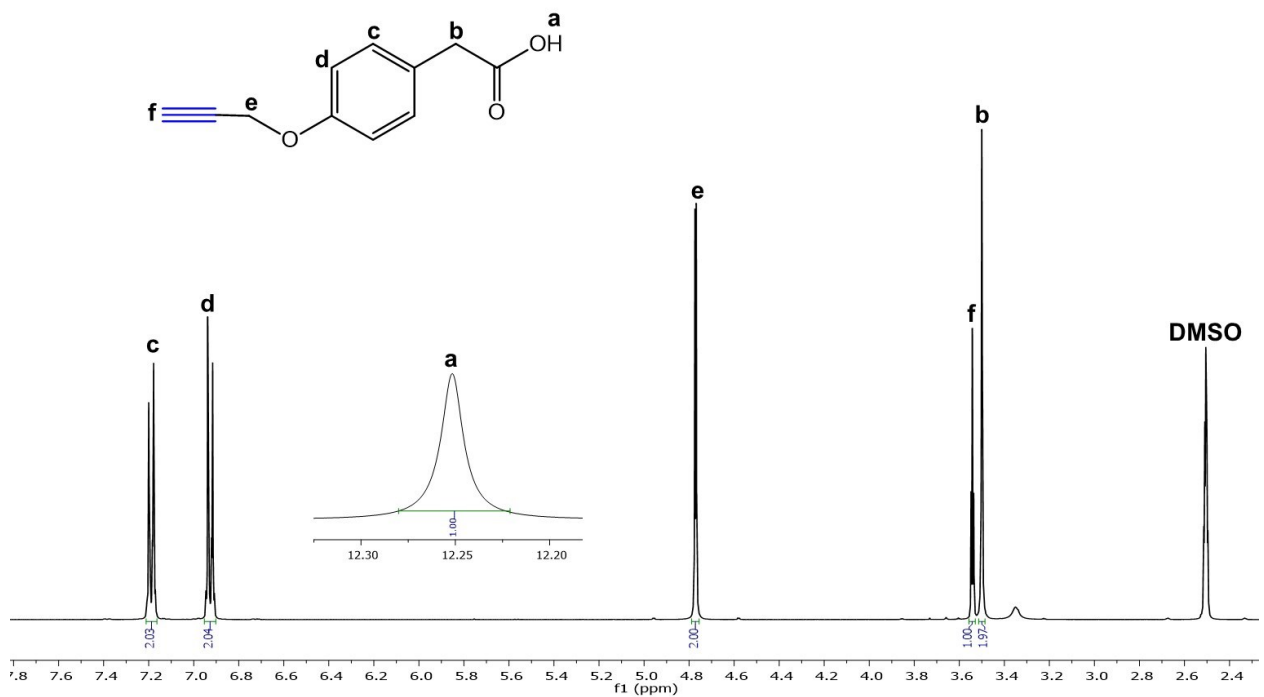

Figure S 4. <sup>1</sup>H-NMR spectrum of intermediate II.

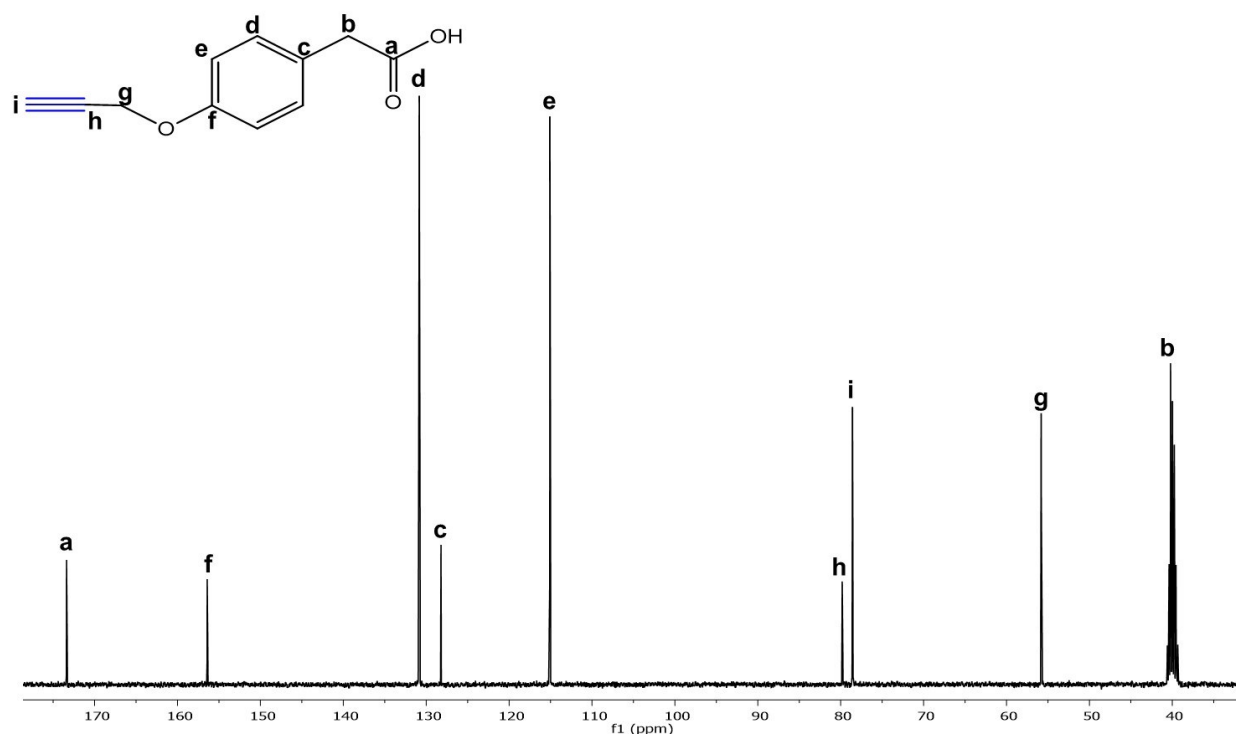

Figure S 5. <sup>13</sup>C-NMR spectrum of intermediate II.

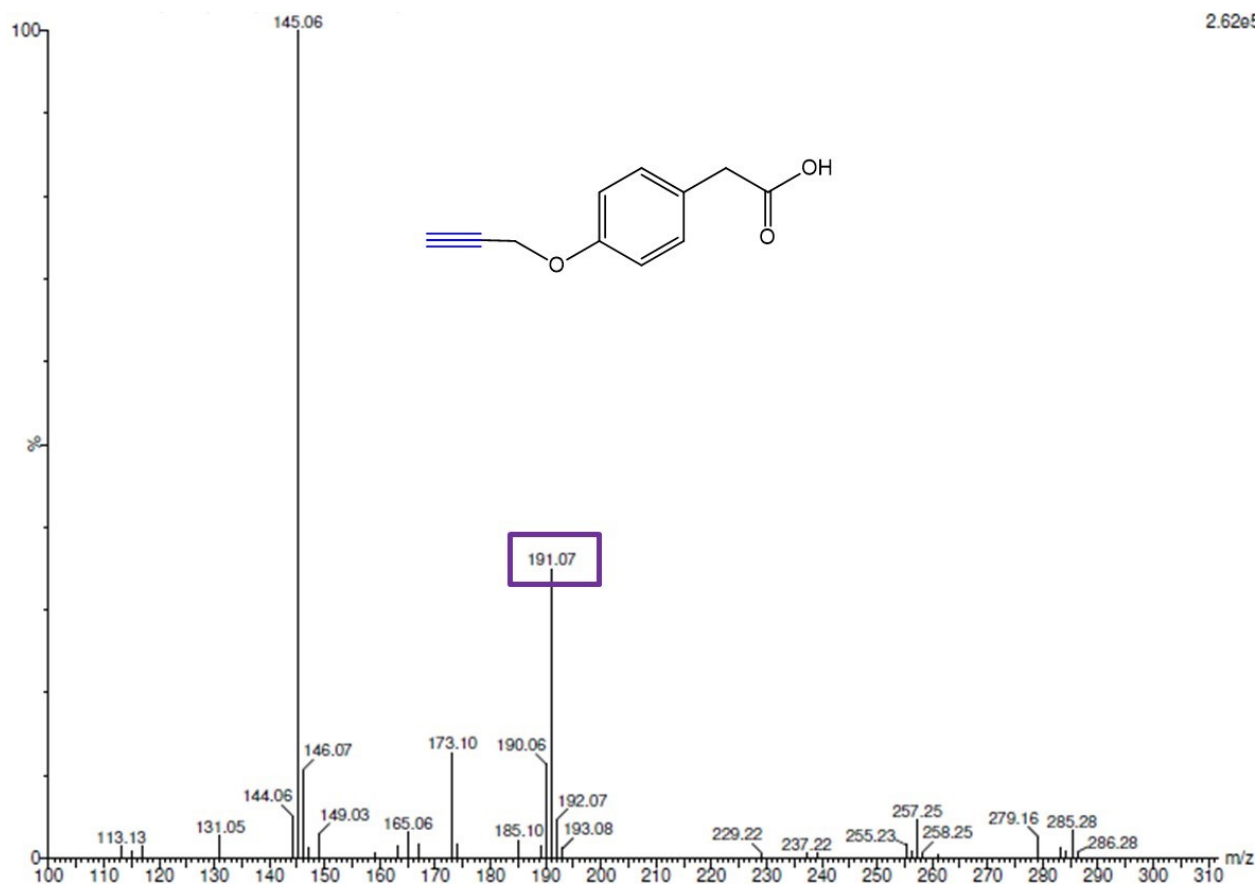

Figure S 6. ESI spectrum of intermediate II.

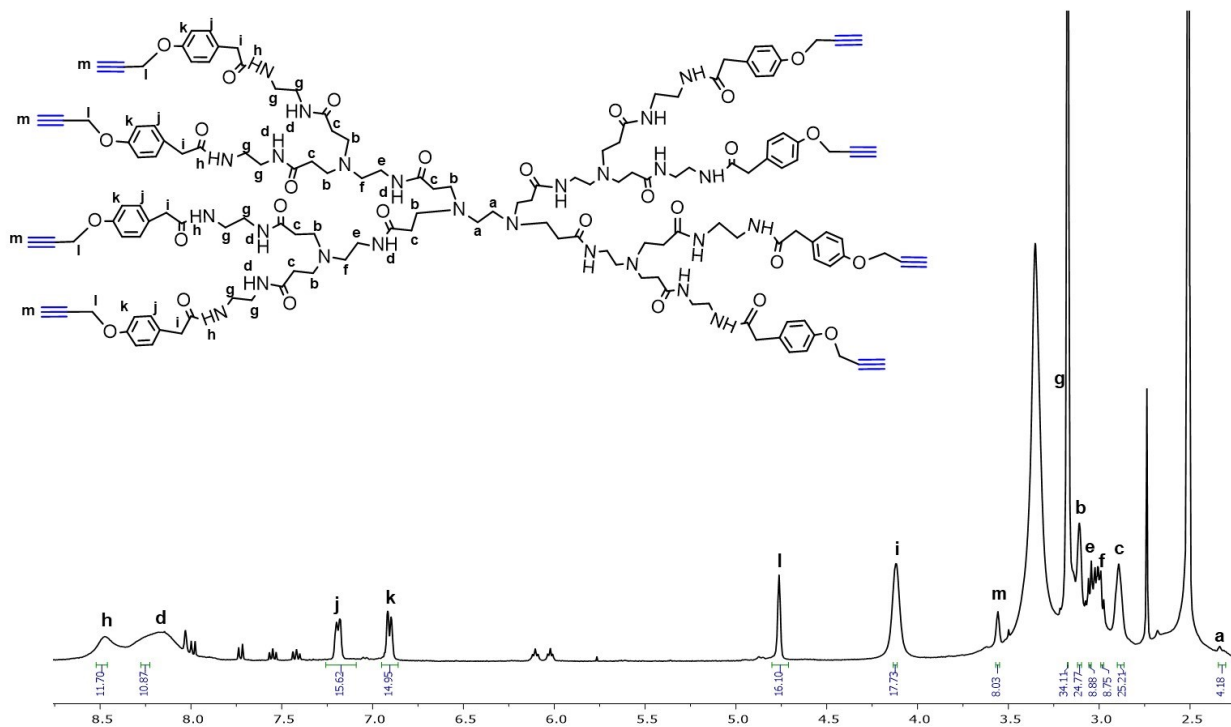

Figure S 7. <sup>1</sup>H-NMR spectrum of Alkynyl-PAMAM G1.

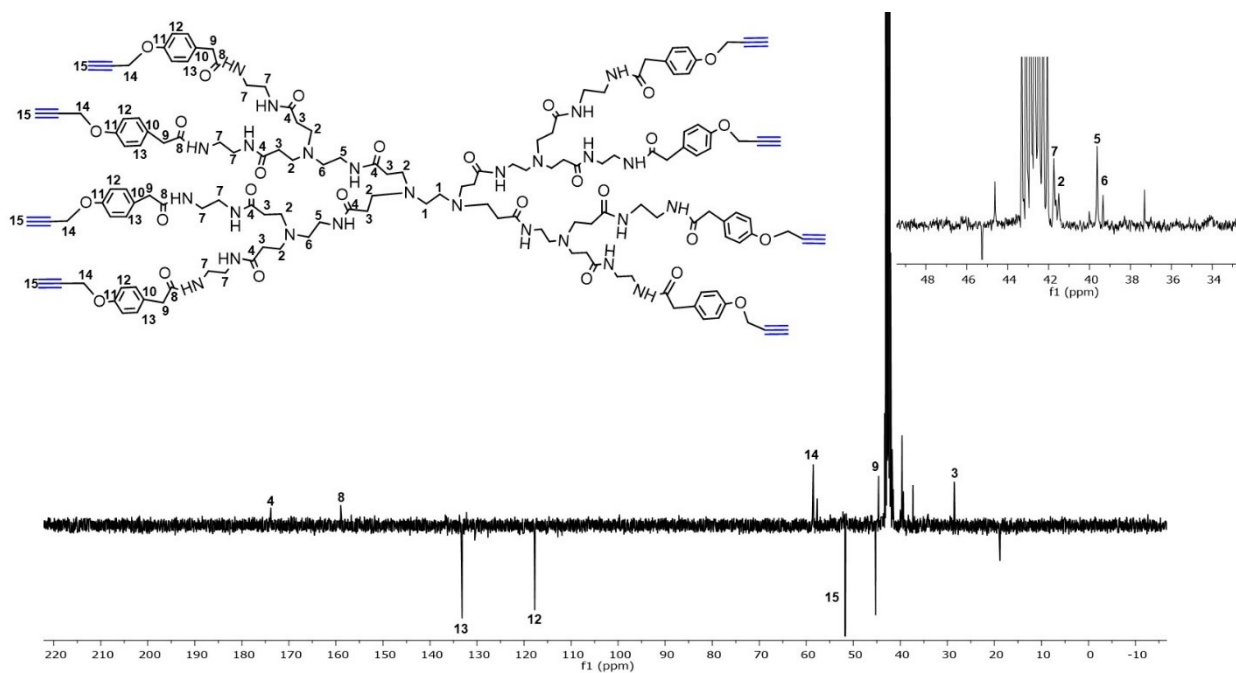

Figure S 8. <sup>13</sup>C-NMR spectrum of Alkynyl-PAMAM G1.

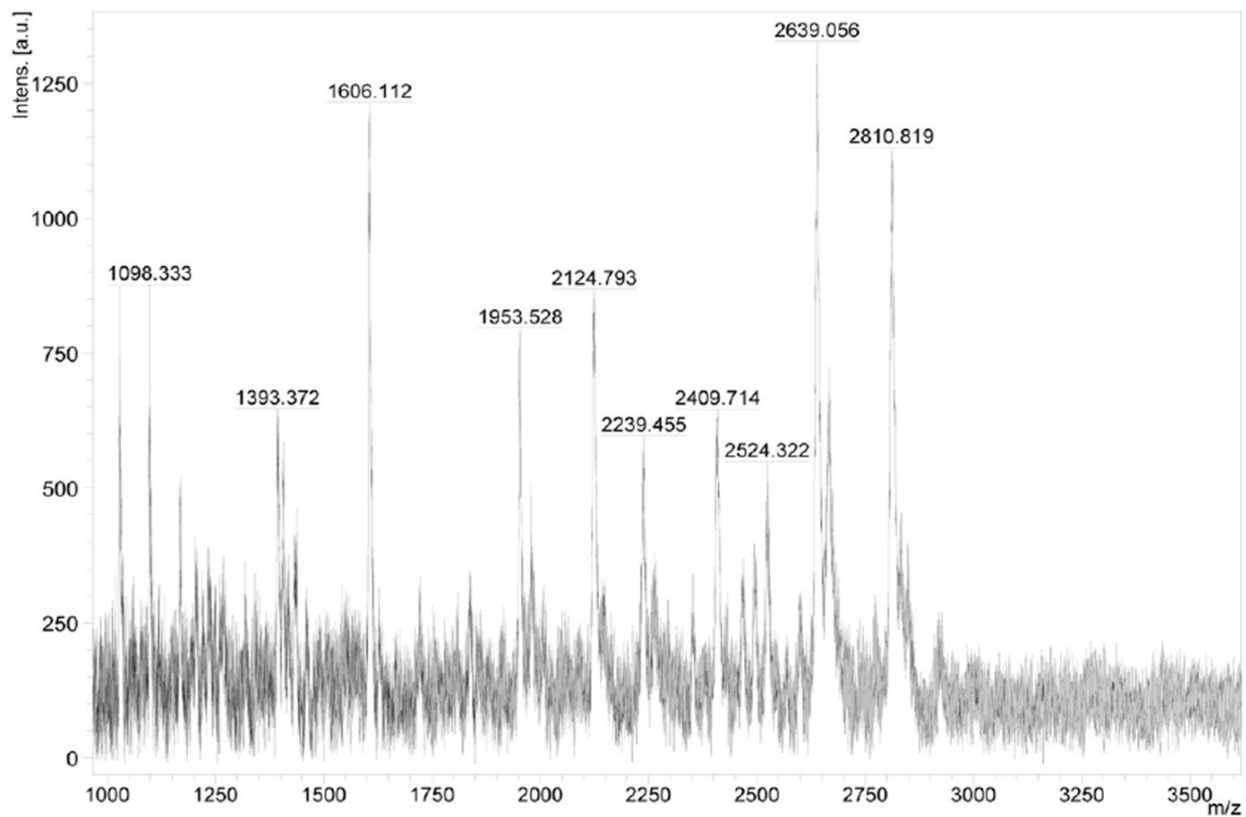

Figure S 9. MALDI spectrum of Alkynyl-PAMAM G1.

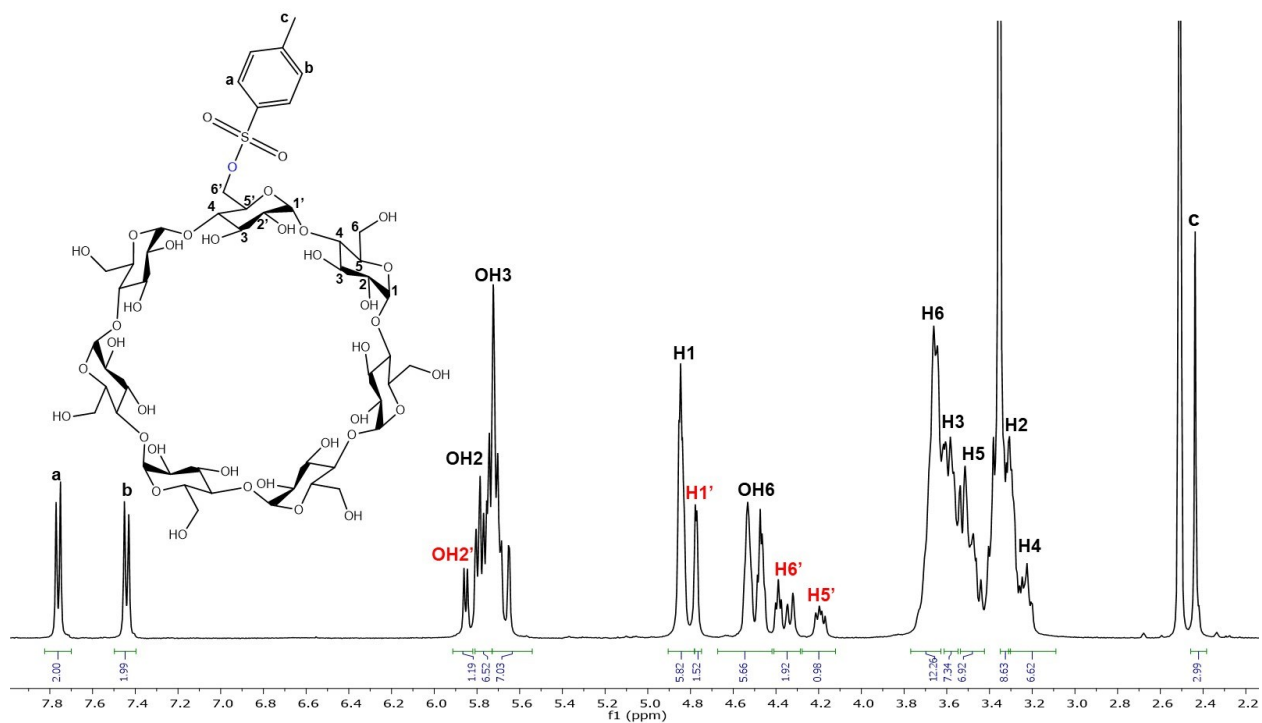

Figure S 10.  $^1\text{H}$ -NMR spectrum of m-Ts- $\beta$ -CD.

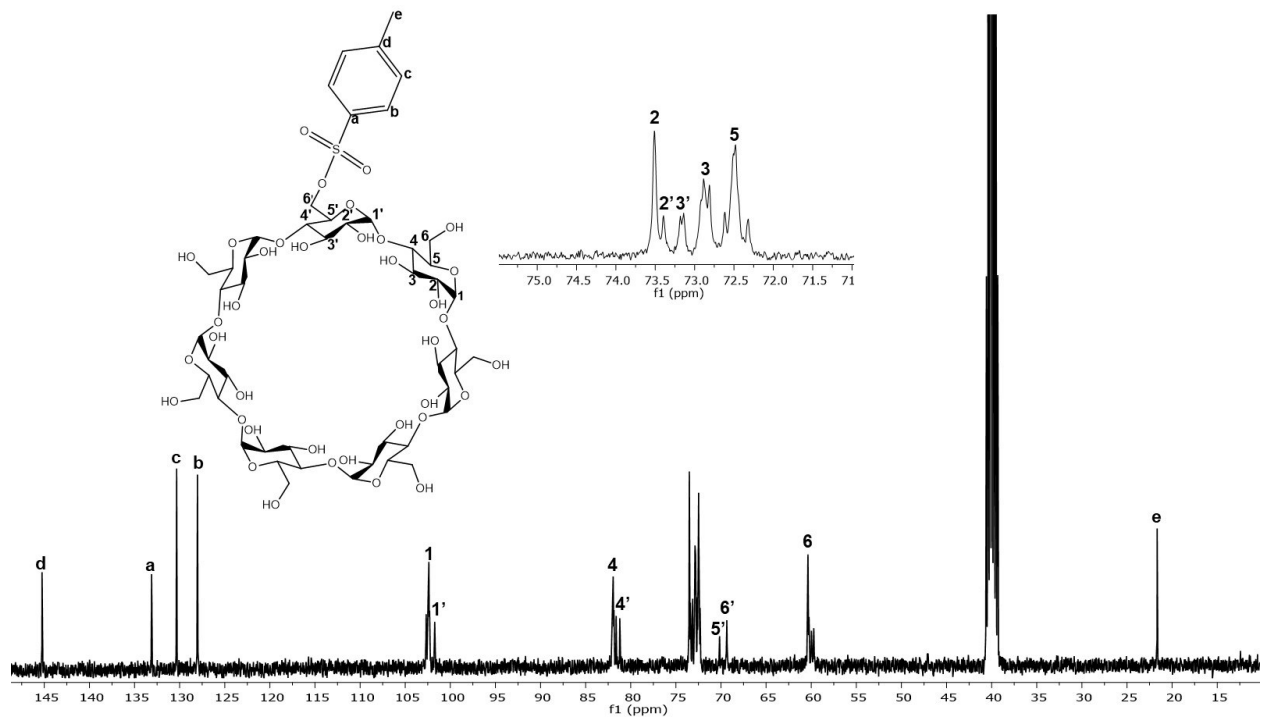

Figure S 11.  $^{13}\text{C}$ -NMR spectrum of m-Ts- $\beta$ -CD.

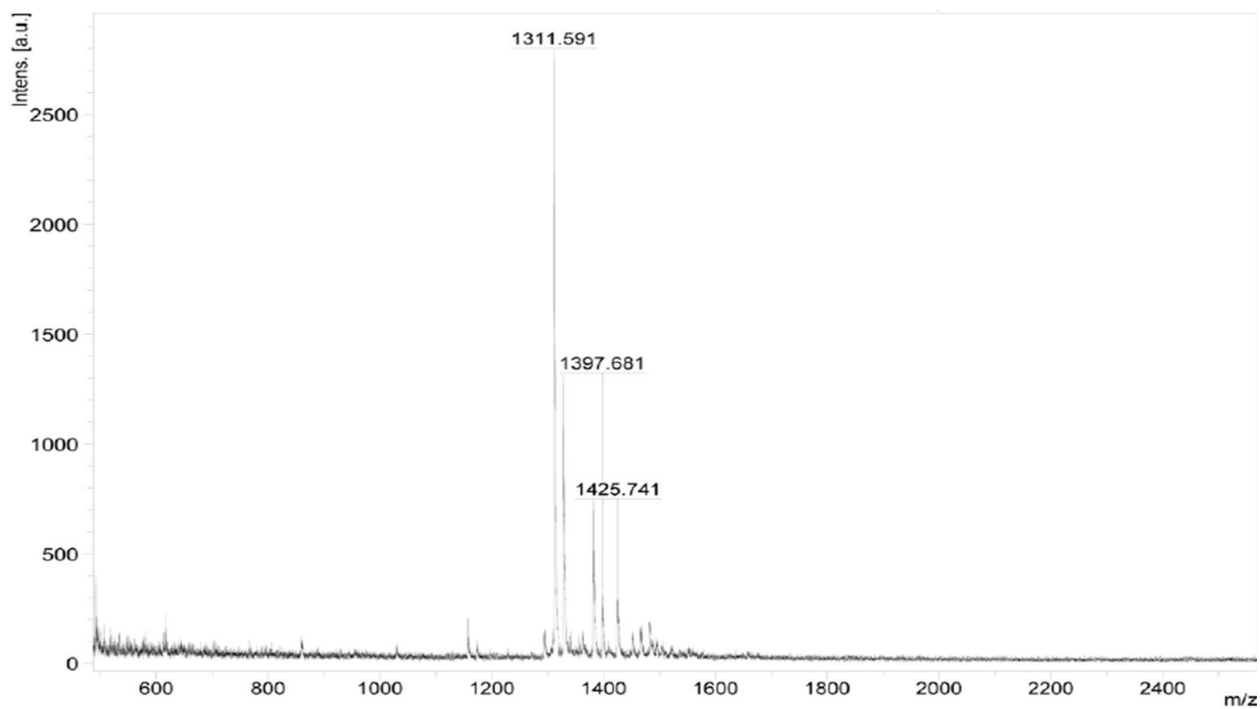

Figure S 12. MALDI spectrum of m-Ts- $\beta$ -CD.

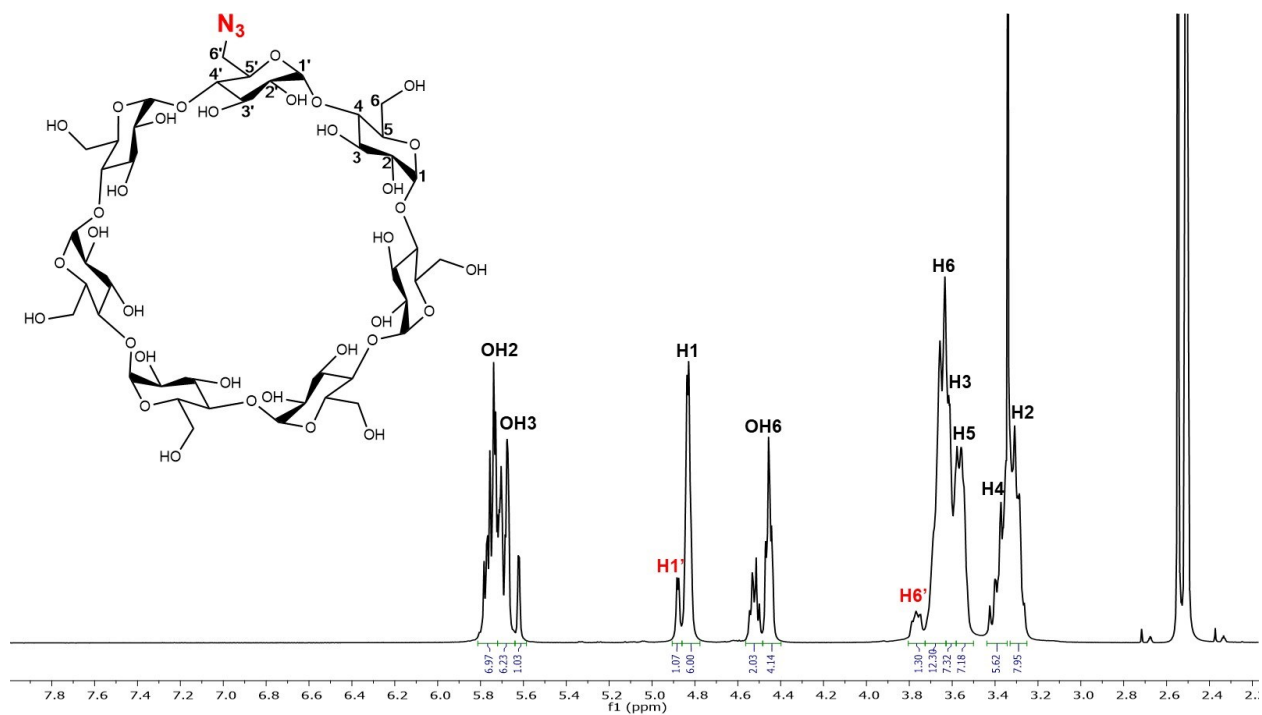

Figure S 13.  $^1\text{H-NMR}$  spectrum of  $m\text{-N}_3\text{-}\beta\text{-CD}$ .

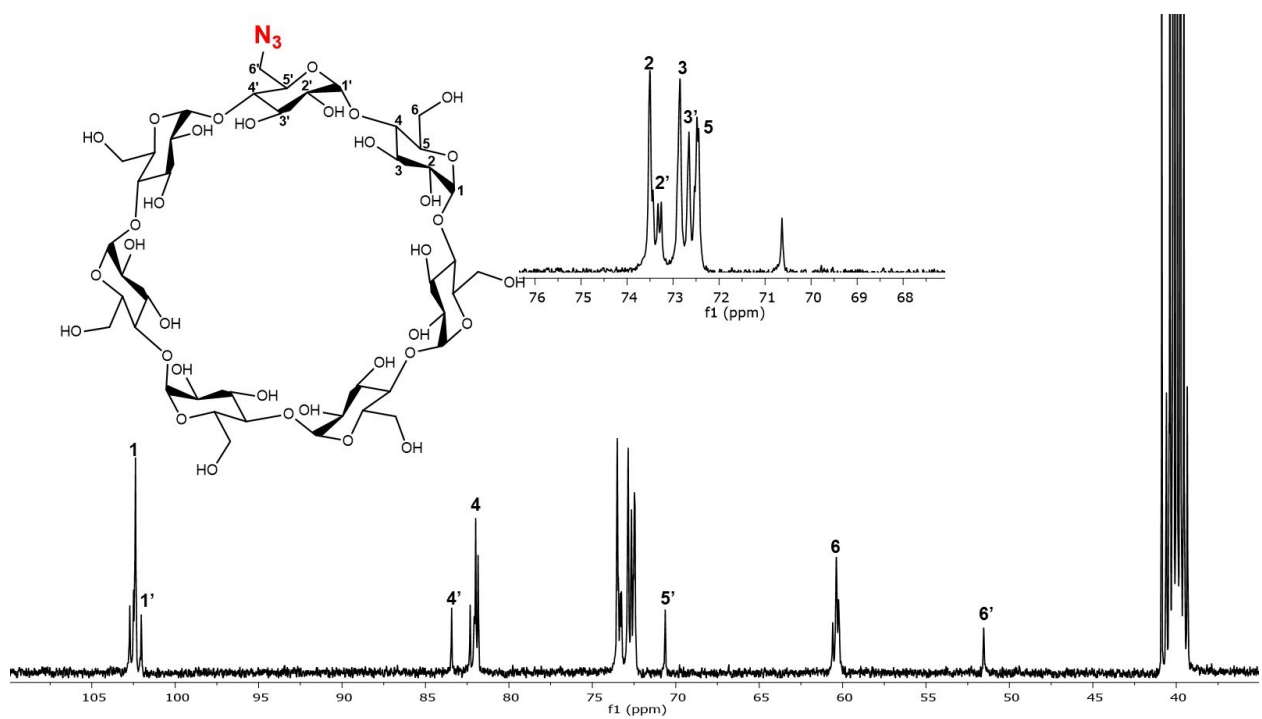

Figure S 14.  $^{13}\text{C-NMR}$  spectrum of  $m\text{-N}_3\text{-}\beta\text{-CD}$ .



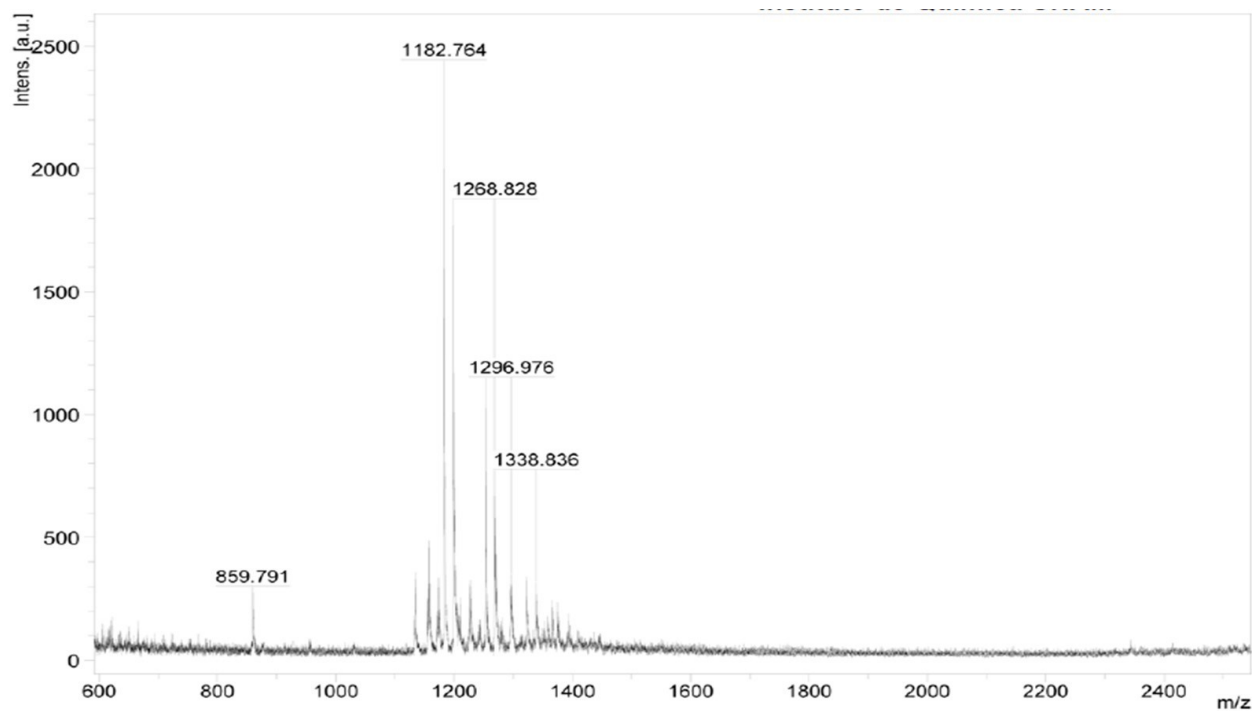

Figure S 15. MALDI spectrum of m-N<sub>3</sub>-β-CD.

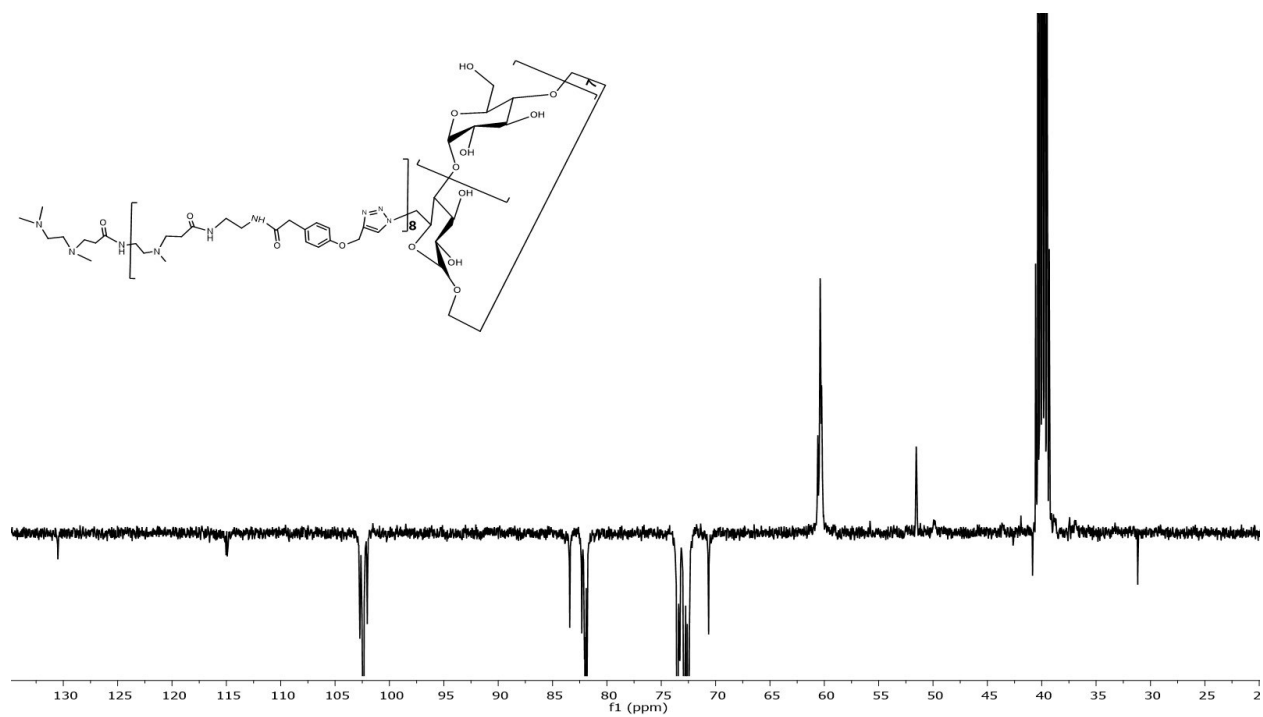

Figure S 16. <sup>13</sup>C-NMR spectrum of PAMAM G1-β-CD dendrimer.

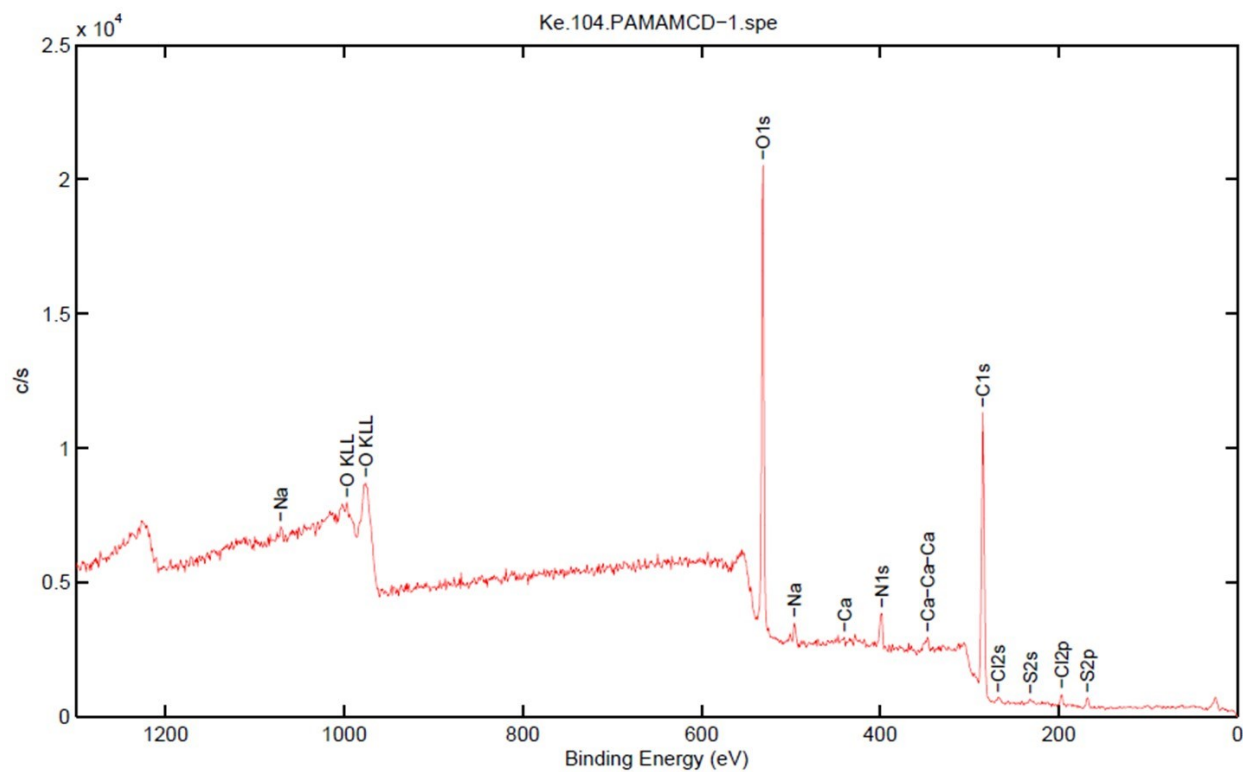

**Figure S 17.** Elemental analysis by X-ray fluorescence of PAMAM G1-β-CD dendrimer.

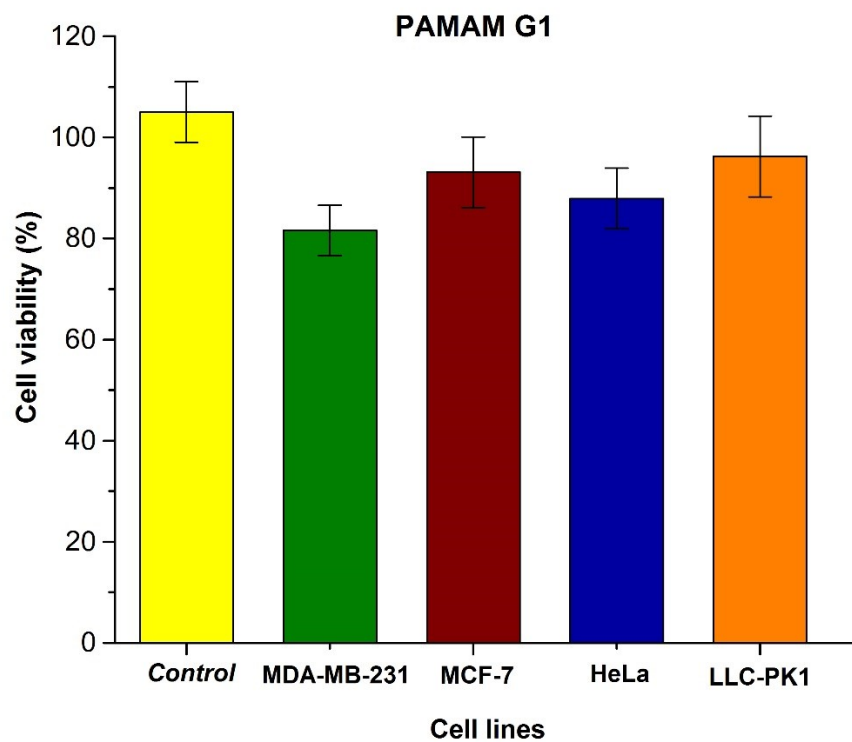

**Figure S 18.** Cell viability in different cell lines of PAMAM G1 dendrimer. Data are means  $\pm$  S.D, n=3.
